# Supplementary material for: Cu( ii ) binding to an antimicrobial shrimp peptide – a small step for structural chemistry, a big leap for medicinal applications
Source: Royal Society of Chemistry journal article supplement (doi:10.1039/d4sc05222f), 2025-01-01
Supplement: d4sc05222f1.pdf [file d4sc05222f1.pdf]

## Cu(II) binding to an antimicrobial shrimp peptide - a small step for structural chemistry, a big leap for medicinal applications

Adriana Miller,<sup>a</sup> Agnieszka Matera-Witkiewicz,<sup>b</sup> Aleksandra Mikołajczyk,<sup>b</sup> Arian Kola,<sup>c</sup> Magdalena Wiloch,<sup>d</sup> Martin Jonsson-Niedziolka,<sup>d</sup> Robert Wieczorek,<sup>a</sup> Joanna Wątyły,<sup>a</sup> Daniela Valensin<sup>\*c</sup> and Magdalena Rowińska-Żyrek<sup>\*a</sup>

<sup>a</sup> Faculty of Chemistry, University of Wrocław, ul. F. Joliot-Curie 14, 50-383 Wrocław, Poland

<sup>b</sup> Screening of Biological Activity Assays and Collection of Biological Material Laboratory, Wrocław Medical University Biobank, Faculty of Pharmacy, Wrocław Medical University, ul. Borowska 211A, 50-556 Wrocław, Poland

<sup>c</sup> Department of Biotechnology, Chemistry and Pharmacy, University of Siena, via Aldo Moro 2, 53100 Siena, Italy

<sup>d</sup> Institute of Physical Chemistry, Polish Academy of Sciences, ul. Marcina Kasprzaka 44/52, 01-224 Warszawa

Corresponding Author

\* Daniela Valensin; e-mail: valensindan@unisi.it

\* Magdalena Rowińska-Żyrek; e-mail: magdalena.rowinska-zyrek@uwr.edu.pl

## Electronic Supplementary Information (ESI)

**Table S1:** Dose dependence of the antimicrobial tests for PvHct and its Cu(II) and Zn(II) complexes.

| Concentration                | 256<br>µg/ml | 128<br>µg/ml | 64 µg/ml | 32 µg/ml | 16 µg/ml | 8 µg/ml | 4 µg/ml | 2 µg/ml | 1 µg/ml | 0,5 µg/ml |
|------------------------------|--------------|--------------|----------|----------|----------|---------|---------|---------|---------|-----------|
| <b>Viability %</b>           |              |              |          |          |          |         |         |         |         |           |
| <b><i>S. aureus</i> MRSA</b> |              |              |          |          |          |         |         |         |         |           |
| PvHct                        | 93           | 93           | 92       | 99       | 100      | 98      | 98      | 102     | 102     | 104       |
| Zn(II)-PvHct                 | 38           | 39           | 41       | 49       | 99       | 99      | 100     | 100     | 101     | 102       |
| Cu(II)-PvHct                 | 4            | 5            | 6        | 5        | 50       | 61      | 88      | 91      | 93      | 94        |
| <b><i>P. aeruginosa</i></b>  |              |              |          |          |          |         |         |         |         |           |
| PvHct                        | 80           | 80           | 80       | 80       | 80       | 80      | 84      | 90      | 96      | 96        |
| Zn(II)-PvHct                 | 81           | 80           | 81       | 84       | 84       | 86      | 88      | 93      | 93      | 94        |
| Cu(II)-PvHct                 | 72           | 73           | 79       | 78       | 79       | 79      | 87      | 88      | 99      | 99        |
| <b><i>K. pneumoniae</i></b>  |              |              |          |          |          |         |         |         |         |           |
| PvHct                        | 84           | 92           | 92       | 92       | 92       | 93      | 93      | 93      | 93      | 93        |
| Zn(II)-PvHct                 | 94           | 94           | 94       | 94       | 95       | 95      | 95      | 95      | 95      | 96        |
| Cu(II)-PvHct                 | 81           | 87           | 93       | 93       | 91       | 91      | 89      | 90      | 94      | 96        |
| <b><i>A. baumannii</i></b>   |              |              |          |          |          |         |         |         |         |           |
| PvHct                        | 84           | 85           | 85       | 85       | 85       | 85      | 85      | 89      | 93      | 100       |
| Zn(II)-PvHct                 | 92           | 95           | 95       | 95       | 90       | 92      | 94      | 95      | 95      | 95        |
| Cu(II)-PvHct                 | 84           | 85           | 85       | 85       | 85       | 85      | 85      | 87      | 98      | 98        |
| <b><i>C. albicans</i></b>    |              |              |          |          |          |         |         |         |         |           |
| PvHct                        | 93           | 86           | 84       | 87       | 89       | 90      | 89      | 93      | 100     | 98        |
| Zn(II)-PvHct                 | 90           | 93           | 94       | 95       | 95       | 95      | 92      | 98      | 100     | 100       |
| Cu(II)-PvHct                 | 90           | 90           | 89       | 92       | 91       | 94      | 92      | 89      | 97      | 97        |
| <b><i>E. coli</i></b>        |              |              |          |          |          |         |         |         |         |           |
| PvHct                        | 95           | 100          | 90       | 90       | 100      | 100     | 100     | 96      | 95      | 100       |
| Zn(II)-PvHct                 | 70           | 93           | 94       | 95       | 95       | 95      | 100     | 100     | 102     | 105       |
| Cu(II)-PvHct                 | 13           | 13           | 13       | 13       | 53       | 73      | 78      | 79      | 79      | 100       |

| Concentration                       | 1024<br>µg/ml | 512<br>µg/ml | 256<br>µg/ml | 128<br>µg/ml | 64<br>µg/ml | 32<br>µg/ml | 16<br>µg/ml | 8<br>µg/ml | 4<br>µg/ml | 2<br>µg/ml | 1<br>µg/ml | 0,5<br>µg/ml |
|-------------------------------------|---------------|--------------|--------------|--------------|-------------|-------------|-------------|------------|------------|------------|------------|--------------|
| <b><i>Enterococcus faecalis</i></b> |               |              |              |              |             |             |             |            |            |            |            |              |
| PvHct                               | 60            | 60           | 60           | 60           | 58          | 59          | 65          | 65         | 72         | 73         | 89         | 99           |
| Zn(II)-PvHct                        | 40            | 50           | 54           | 64           | 65          | 65          | 86          | 87         | 94         | 98         | 100        | 100          |
| Cu(II)-PvHct                        | 5             | 6            | 7            | 7            | 7           | 8           | 51          | 65         | 69         | 73         | 81         | 89           |

**Table S2:** Cell viability using Neutral red uptake assay (NR) performed on human primary renal proximal tubule epithelial cells (RPTEC) from ECACC collection, after 48 and 72 h incubation with PvHct and PvHct-metal ion systems.

|                     | Concentration [ $\mu\text{g/mL}$ ] | Concentration [ $\mu\text{M}$ ] | Incubation time |     |
|---------------------|------------------------------------|---------------------------------|-----------------|-----|
|                     |                                    |                                 | 48h             | 72h |
|                     |                                    |                                 | viability [%]   |     |
| <b>PvHct</b>        | 344                                | 125                             | 53              | 0   |
|                     | 206.40                             | 75                              | 57              | 33  |
|                     | 27.52                              | 10                              | 94              | 86  |
|                     | 2.75                               | 1                               | 94              | 86  |
| <b>Cu(II)-PvHct</b> | 351.94                             | 125                             | 62              | 22  |
|                     | 211.16                             | 75                              | 67              | 27  |
|                     | 28.16                              | 10                              | 101             | 86  |
|                     | 2.82                               | 1                               | 105             | 92  |
| <b>Zn(II)-PvHct</b> | 352.18                             | 125                             | 47              | 2   |
|                     | 211.31                             | 75                              | 48              | 33  |
|                     | 28.17                              | 10                              | 87              | 85  |
|                     | 2.82                               | 1                               | 87              | 86  |

**Table S3:** *In vitro* antibacterial activity of Zn(II) and Cu(II) chlorides, determined as a minimal inhibitory concentration required to inhibit the growth of 50% microorganisms (MIC50) ( $\mu\text{g/mL}$ ); n/d, not determined. % of viability were obtained after 24h of experiment.

| Strain (ATCC)                |        | % of viability in max. concentration ( $\mu\text{g/mL}$ ) | % of viability in min concentration ( $\mu\text{g/mL}$ ) | MIC ( $\mu\text{g/mL}$ ) | MBC/MFC ( $\mu\text{g/mL}$ ) |
|------------------------------|--------|-----------------------------------------------------------|----------------------------------------------------------|--------------------------|------------------------------|
| <b><i>A. baumannii</i></b>   | Cu(II) | 97%                                                       | 95%                                                      | 512                      | 1024                         |
|                              | Zn(II) | 96%                                                       | 100%                                                     | n/d                      | n/d                          |
| <b><i>E. coli</i></b>        | Cu(II) | 94%                                                       | 95%                                                      | 1024                     | n/d                          |
|                              | Zn(II) | 92%                                                       | 96%                                                      | 1024                     | n/d                          |
| <b><i>E. faecalis</i></b>    | Cu(II) | 82%                                                       | 92%                                                      | 1024                     | n/d                          |
|                              | Zn(II) | 76%                                                       | 90%                                                      | n/d                      | n/d                          |
| <b><i>P. aeruginosa</i></b>  | Cu(II) | 77%                                                       | 95%                                                      | 512                      | 1024                         |
|                              | Zn(II) | 80%                                                       | 92%                                                      | 1024                     | n/d                          |
| <b><i>S. aureus</i> MRSA</b> | Cu(II) | 87%                                                       | 92%                                                      | 1024                     | n/d                          |
|                              | Zn(II) | 86%                                                       | 97%                                                      | 1024                     | n/d                          |
| <b><i>K. pneumoniae</i></b>  | Cu(II) | 77%                                                       | 95%                                                      | 512                      | n/d                          |
|                              | Zn(II) | 80%                                                       | 100%                                                     | 1024                     | n/d                          |
| <b><i>C. albicans</i></b>    | Cu(II) | 90%                                                       | 86%                                                      | n/d                      | n/d                          |
|                              | Zn(II) | 80%                                                       | 92%                                                      | n/d                      | n/d                          |

**Table S4:** Results of the analysis of secondary structure, obtained from BestSel (1) and DichroWeb (2) programs. Addition of Cu(II) ions causes a slight increase in percentage of helical structure.

| <b>PvHct (peptide)</b>            |        | <b>Cu(II)-PvHct</b> |        |             |        |
|-----------------------------------|--------|---------------------|--------|-------------|--------|
| <b><i>BestSel</i></b>             |        |                     |        |             |        |
| helix1+helix2                     | 22,9 % | helix1+helix2       | 24,5 % | difference: | 1,6 %  |
| strand1+strand2                   | 11 %   | strand1+strand2     | 12,2 % |             | 1,2 %  |
| turns                             | 3,7 %  | turns               | 3,1 %  |             | -0,6 % |
| unordered                         | 44,8 % | unordered           | 38,6 % |             | -6,2 % |
| <b><i>DichroWeb (Selcon3)</i></b> |        |                     |        |             |        |
| helix1+helix2                     | 26,2 % | helix1+helix2       | 30,2 % | difference: | 4 %    |
| strand1+strand2                   | 23,4 % | strand1+strand2     | 21,3 % |             | -2,1 % |
| turns                             | 23,1 % | turns               | 22,0 % |             | -1,1 % |
| unordered                         | 28,9 % | unordered           | 28,4 % |             | -0,5 % |

**Table S5:** Proton assignment of PvHct 0.5 mM in SDS 40 mM, T=298 K, pH=7.4

|        | H <sub>N</sub> | H <sub>α</sub> | H <sub>β</sub> | H <sub>γ</sub> | Others                                   |
|--------|----------------|----------------|----------------|----------------|------------------------------------------|
| Phe-1  |                | 4.32           | 3.34-3.10      |                | H <sub>δ</sub> 7.37                      |
| Glu-2  | 8.68           | 4.36           | 2.09-1.90      | 2.28           |                                          |
| Asp-3  | 8.07           | 4.66           | 2.74           |                |                                          |
| Leu-4  | 8.18           | 4.52           | 1.79-1.70      | 1.58           | H <sub>δ</sub> 0.96-0.92                 |
| Pro-5  |                | 4.31           | 2.19-1.94      | 1.82-1.50      | H <sub>δ</sub> 3.78-3.49                 |
| Asn-6  | 8.07           | 4.63           | 2.73-2.55      |                | H <sub>δ</sub> 7.59-6.86                 |
| Phe-7  | 8.15           | 4.56           | 3.25- 3.06     |                | H <sub>δ</sub> 7.27                      |
| Gly-8  | 8.33           | 3.90           |                |                |                                          |
| His-9  | 8.21           | 4.66           | 3.25           |                | H <sub>δ</sub> 7.22                      |
| Ile-10 | 7.80           | 4.08           | 1.98           | 1.54-1.19      | H <sub>δ</sub> 0.93                      |
| Gln-11 | 8.34           | 4.33           | 2.14-2.02      | 2.31           | H <sub>δ</sub> 7.36-6.78                 |
| Val-12 | 7.66           | 4.13           | 2.14           | 0.95           |                                          |
| Lys-13 | 7.97           | 4.38           | 1.87-1.80      | 1.47           | H <sub>δ</sub> 1.73; H <sub>ε</sub> 3.02 |
| Val-14 | 7.68           | 3.90           | 1.99           | 0.81-0.67      |                                          |
| Phe-15 | 7.81           | 4.70           | 3.38-3.04      |                | H <sub>δ</sub> 7.36                      |
| Asn-16 | 8.27           | 4.81           | 2.82-2.68      |                | H <sub>δ</sub> 7.52-6.81                 |
| His-17 | 8.05           | 4.48           | 3.40-3.26      |                | H <sub>δ</sub> 7.33                      |
| Gly-18 | 8.36           | 4.04-3.91      |                |                |                                          |
| Glu-19 | 8.01           | 4.13           | 1.92           | 2.19           |                                          |
| His-20 | 8.35           | 4.71           | 3.30-3.22      |                | H <sub>δ</sub> 7.41                      |
| Ile-21 | 7.68           | 4.14           | 1.87           | 1.42-1.16      | H <sub>δ</sub> 0.81                      |
| His-22 | 8.06           | 4.73           | 3.28-3.20      |                | H <sub>δ</sub> 7.31                      |
| His-23 | 8.11           | 4.49           | 3.26-3.13      |                | H <sub>δ</sub> 7.29                      |

## Stoichiometry

Mass spectrometry indicated the stoichiometry of the formed PvHCt Zn(II) and Cu(II) complexes.

Fig. S1A and S1B present the MS spectra for Zn(II)-PvHCt complex. In the Fig. S1A, three main signals can be observed. The most intensive one ( $m/z = 688.8$ ,  $z = 4+$ ) comes from the single peptide and the other two were identified as a sodium adduct ( $m/z = 694.3$ ,  $z = 4+$ ) and Zn(II)-PvHCt complex ( $m/z = 704.3$ ,  $z = 4+$ ).

Fig. S1C and S1D show spectra for Cu(II)-PvHCt complex. In the Fig. S1C, eight signals can be observed, and the most intensive were assigned to a single peptide ( $m/z = 688.8$ ,  $z = 4+$ ), its sodium adduct ( $m/z = 694.3$ ,  $z = 4+$ ) and Cu(II)-PvHCt complex ( $m/z = 704.3$ ,  $z = 4+$ ).

In the Fig. S1B and S1D the experimental and simulated isotopic patterns were compared. The results confirm that PvHCt forms Cu(II) and Zn(II) complexes only in a mononuclear form, with a metal:ligand ratio 1:1.

A)

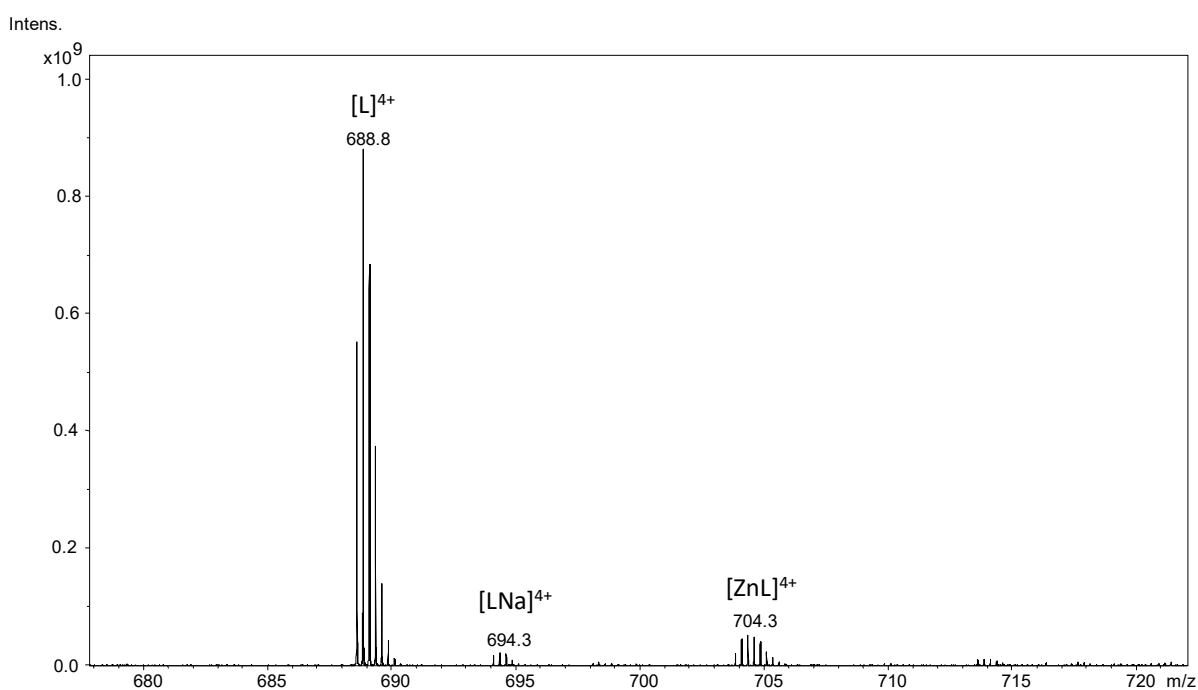

B)

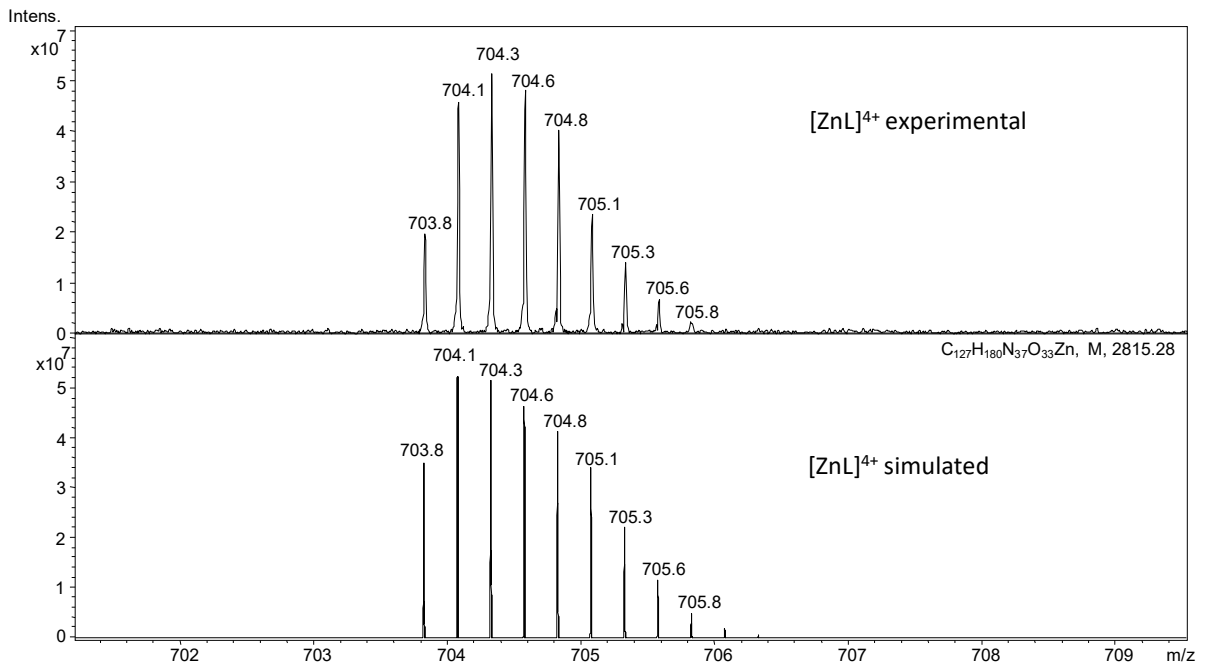

C)

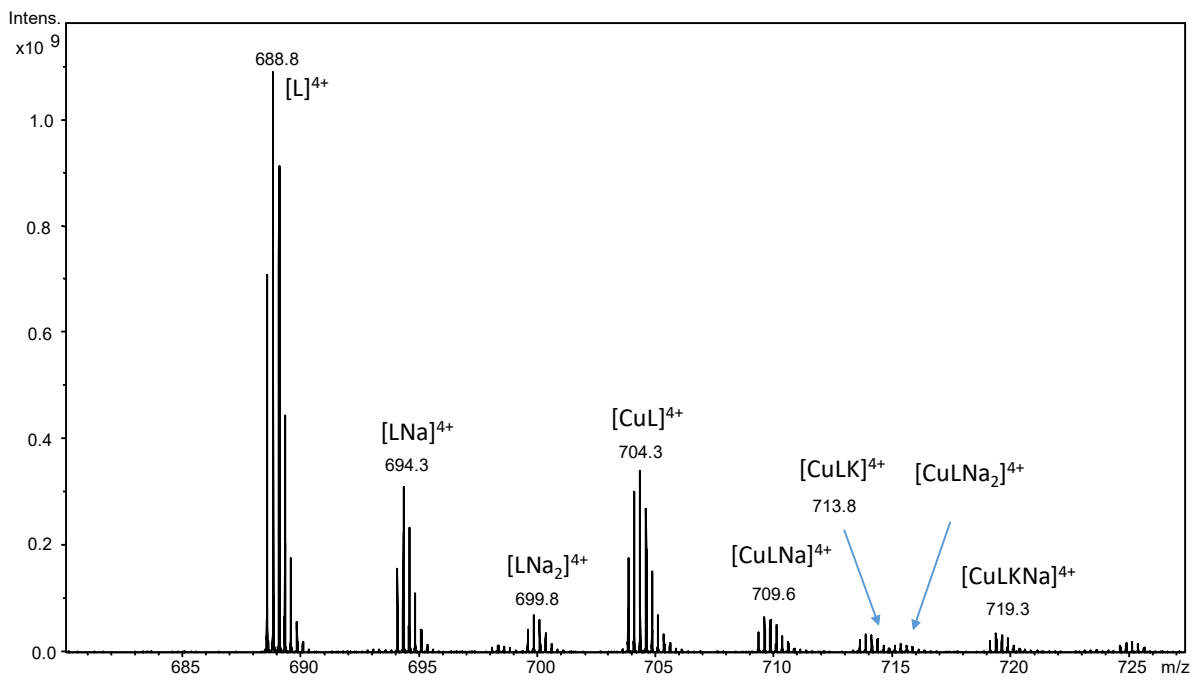

D)

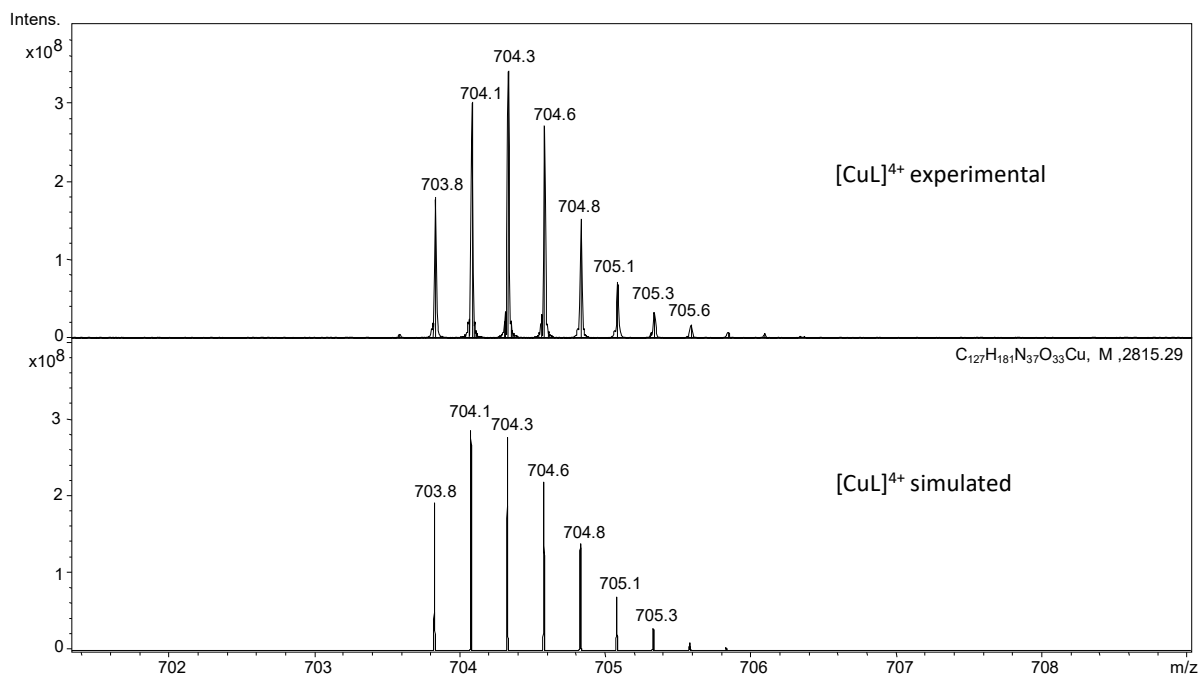

**Fig. S1:** ESI-MS spectra of: MS spectra of Zn(II)-PvHct (A, B) and Cu(II)-PvHct (C, D) samples. In the B and D, the experimental (top) and simulated (bottom) results are compared and clearly show the presence of the complex. Conditions: [Zn(II)] = [Cu(II)] = [PvHct] =  $3 \times 10^{-4}$  M in a 1:1 methanol-water mixture;  $M^{2+}$ :peptide ratio was 1:1, pH = 6

A)

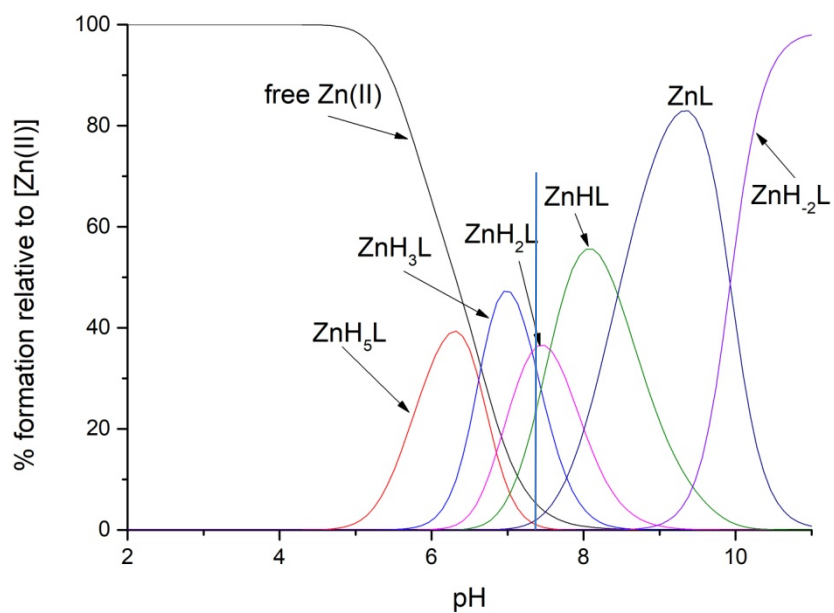

B)

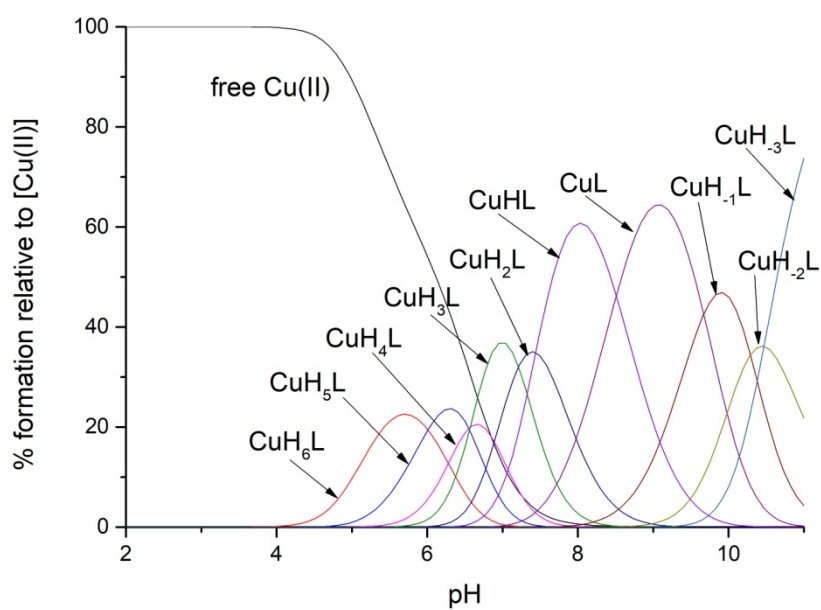

**Fig. S2:** Distribution diagrams for the formation of: A) Zn(II) complex with PvHCt; B) Cu(II) complex with PvHCt; T=298 K, I= 40 mM SDS,  $[M^{2+}] = 0.5 \cdot 10^{-3}$  M;  $M^{2+}:L$  molar ratio = 1:1



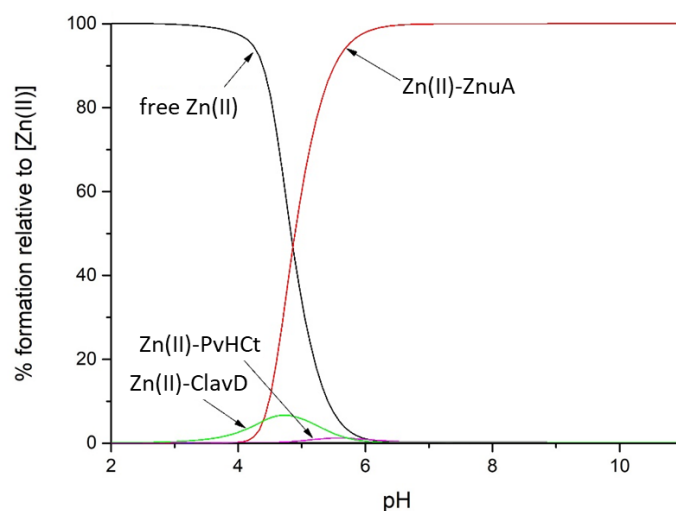

**Fig. S3:** A competition diagram between Zn(II) and PvHct, clavain D and the fragment of ZnuA transporter. Diagram presents a hypothetical situation when equimolar amounts of reagents are mixed. Clavainin D coordinates Zn(II) by three, and ZnuA fragment (Ac<sub>-115</sub>MKSI-HGDDDDHDHAEKSDDEHHHGDFNMHLW145-NH<sub>2</sub>), by four imidazole nitrogens. [Zn(II)] = [PvHct] = [clavainin D] = [ZnuA] = 0.001 M.

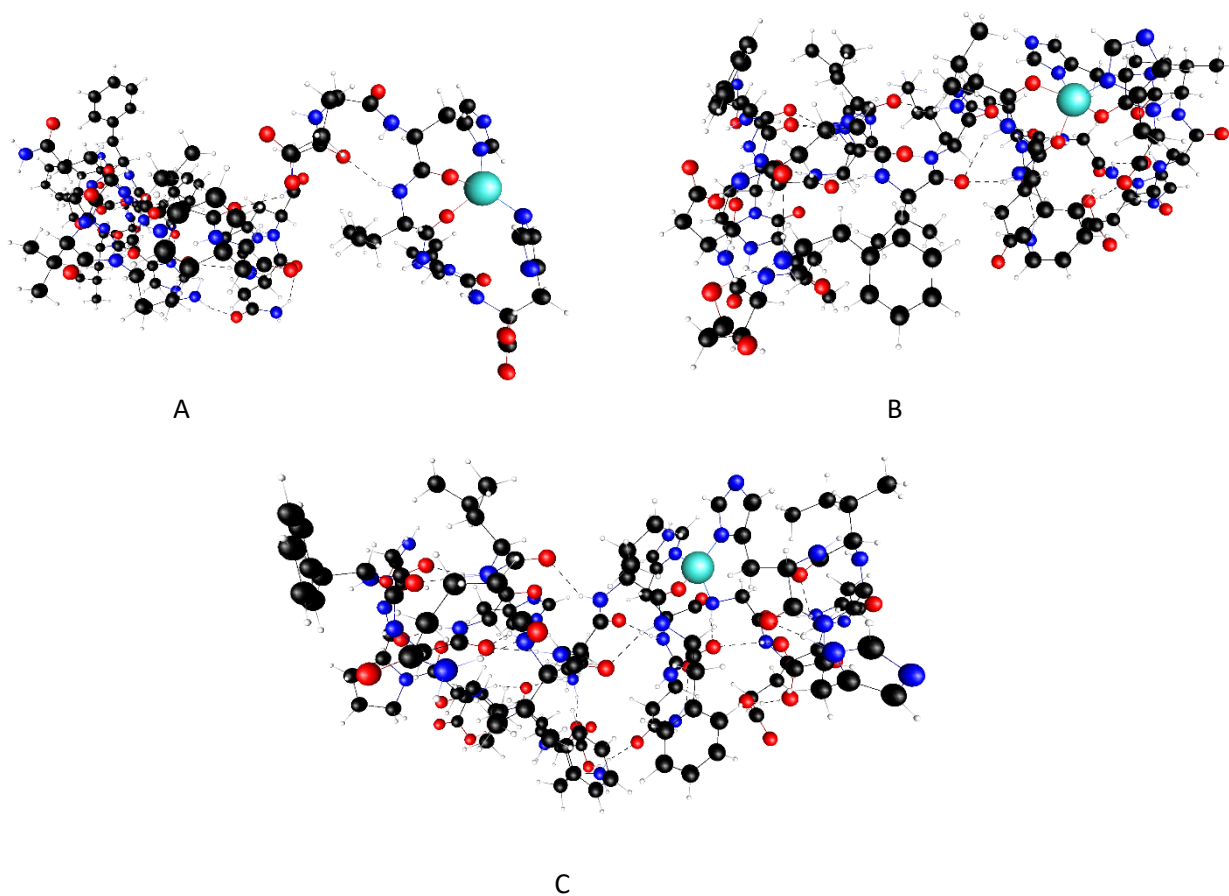

**Fig. S4:** The structures of three Zn(II)-PvHct complexes. In (A), Zn(II) is bound to His20 and His23, in (B) – to His22 and His23, (C) – to His17 and His22.

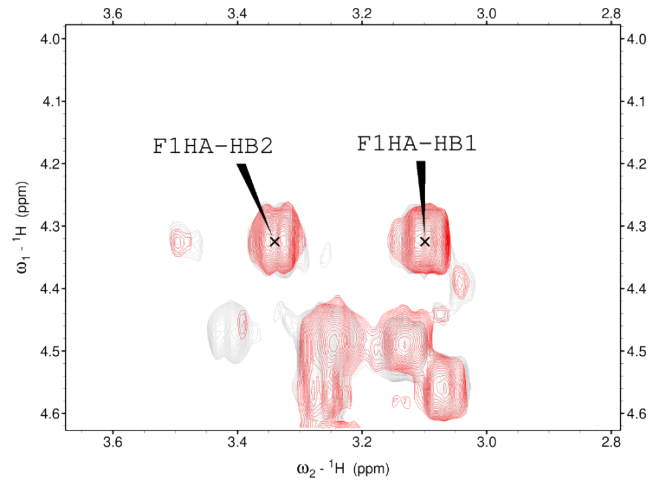

**Fig. S5:** Superimposition of aliphatic region of  $^1\text{H}$ - $^1\text{H}$  TOCSY spectra of PvHCt, 1 mM in absence (gray) and in presence of 0.2 Zn(II) eqs. in T=298 K (red), pH 7.4.

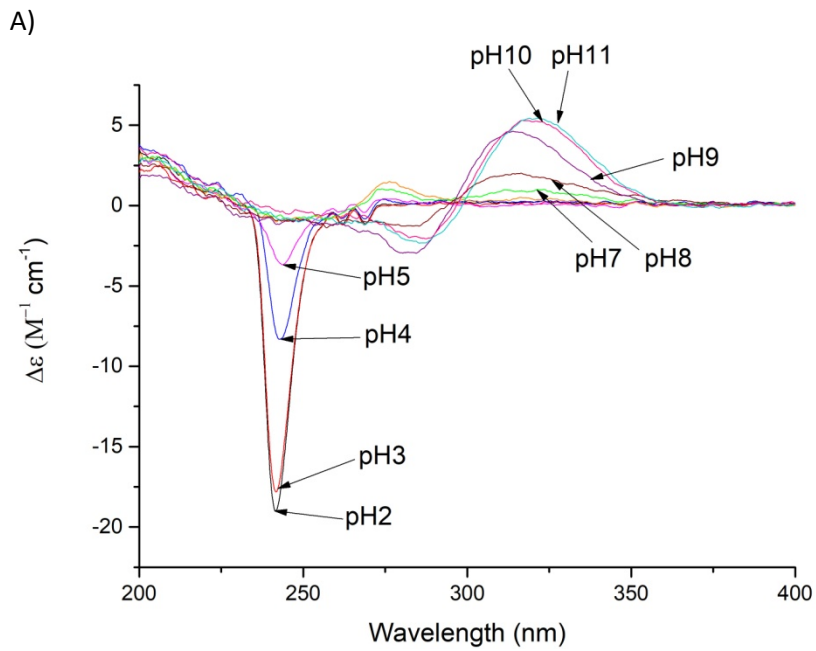

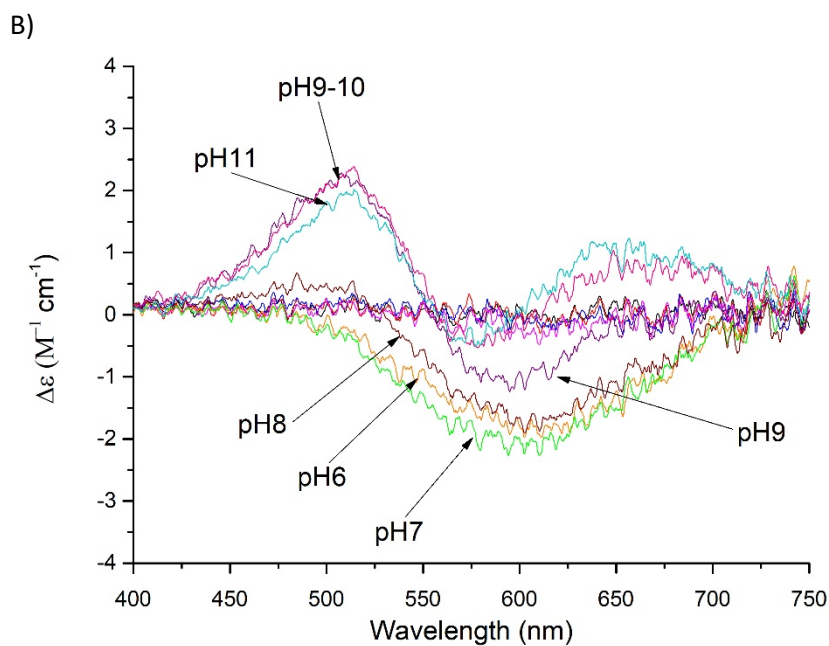

**Fig. S6:** Circular dichroism spectra of Cu(II) complexes with PvHct in range A) 200-400 nm, B) 400-800 nm in pH range 2-11. Conditions:  $T = 298 \text{ K}$ ,  $l = 40 \text{ mM SDS}$ ,  $[\text{Cu(II)}] = [\text{PvHct}] = 0.001 \text{ M}$ .

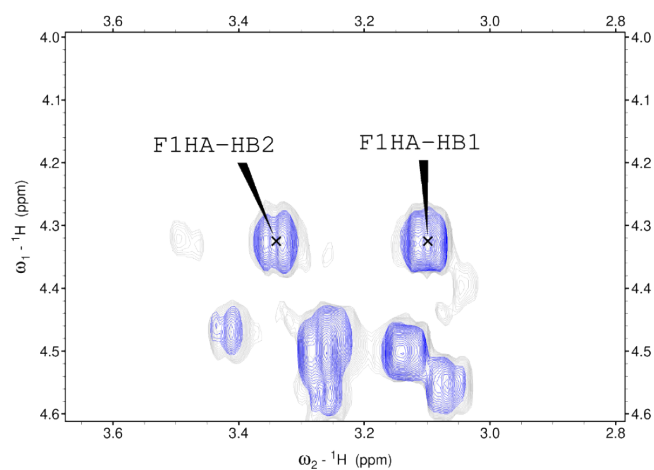

**Fig. S7:** Superimposition of aliphatic region of  ${}^1\text{H}$ - ${}^1\text{H}$  TOCSY spectra of PvHct, 1 mM in absence (gray) and in presence of 0.1 Cu(II) eqs. in  $T=298 \text{ K}$  (blue), pH 7.4.

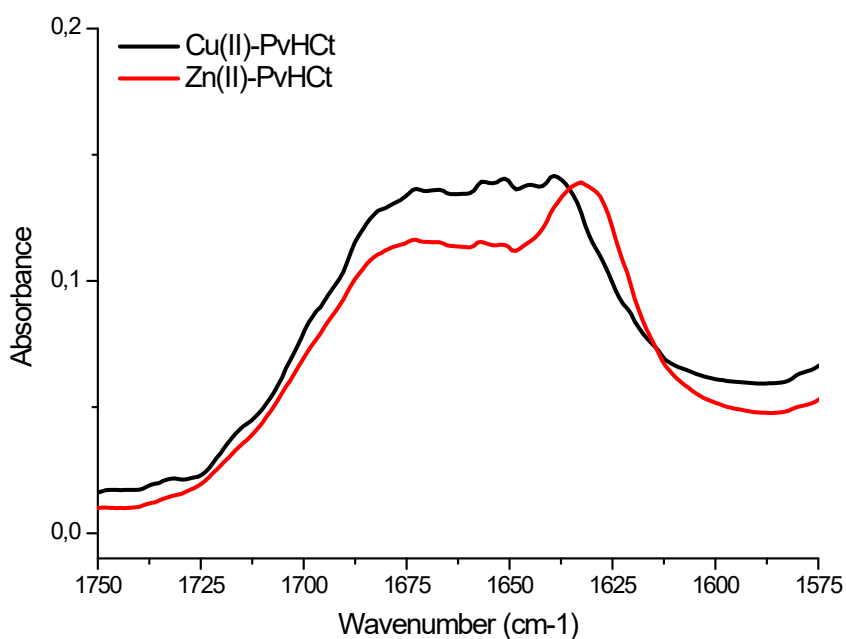

**Fig. S8:** FT-IR spectra of Cu(II) (black line) and Zn(II) bound (red line) forms of PvHct. All the spectra were collected at  $T=298$  K (blue), pH 7.4. The molar concentrations are 1.0 and 0.9 mM for the peptides and metal ions, respectively.

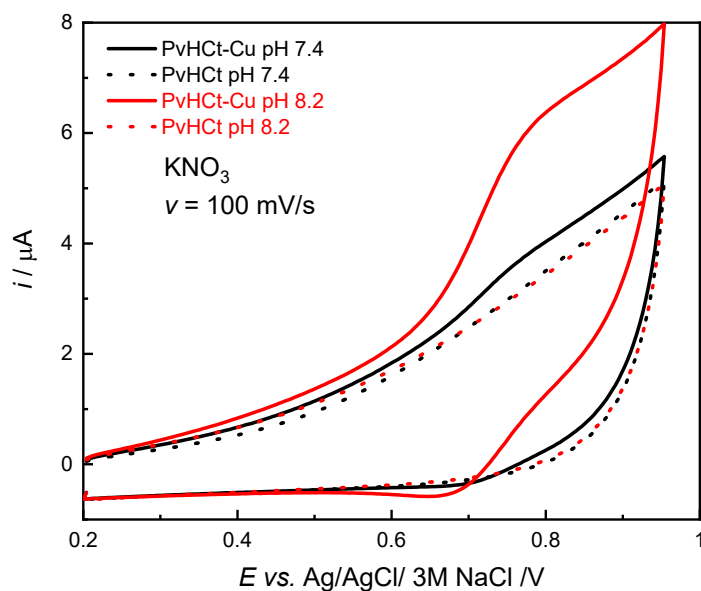

**Fig. S9:** CV obtained for Cu(II) complexes with PvHct (1: 0.9 molar ratio) and PvHct alone at pH 7.4 (black curves), 8.2 (red curves), recorded in 4 mM  $\text{HNO}_3$ / 96 mM  $\text{KNO}_3$ ,  $v = 100$  mV/s

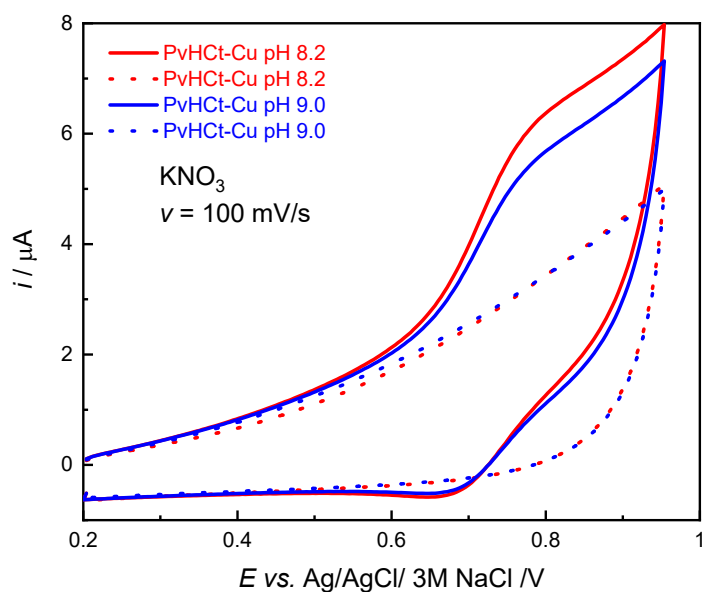

**Fig. S10:** CV obtained for Cu(II) complexes with PvHct (1: 0.9 molar ratio) and PvHct alone at 8.2 (red curves), 89,0 (blue curves), recorded in 4 mM HNO<sub>3</sub>/ 96 mM KNO<sub>3</sub> ,  $v = 100$  mV/s

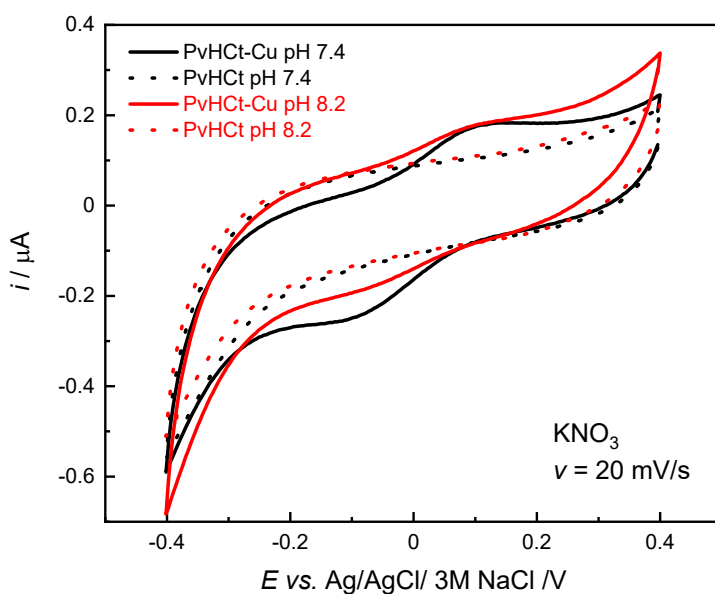

**Fig. S11:** CV obtained for Cu(II) complexes with PvHct (1: 0.9 molar ratio) and PvHct alone at pH 7.4 (black curves), 8.2 (red curves), recorded in 4 mM HNO<sub>3</sub>/ 96 mM KNO<sub>3</sub> ,  $v = 20$  mV/s

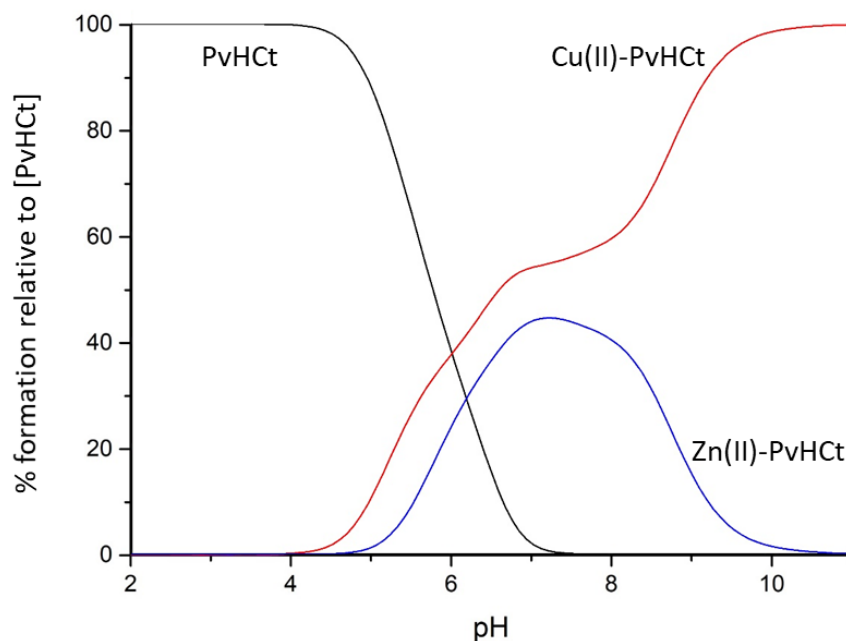

**Fig. S12:** A competition diagram between PvHct, Zn(II) and Cu(II) ions. Diagram presents a hypothetical situation when equimolar amounts of reagents are mixed. It suggests that at pH around 7.4 the stability of complexes with Zn(II) and Cu(II) are comparable, with a slight advantage of the Cu(II) complex.  $[PvHct] = [Zn(II)] = [Cu(II)] = 0.001$  M.

## References

1. Micsonai, A.; Moussong, É.; Wien, F.; Boros, E.; Vadász, H.; Murvai, N.; Lee, Y.-H.; Molnár, T.; Réfrégiers, M.; Goto, Y.; Tantos, Á.; Kardos, J. BeStSel: webserver for secondary structure and fold prediction for protein CD spectroscopy. *Nucleic Acids Res* **2022**, *50* (W1), W90-W98.
2. Miles, A. J.; Ramalli, S. G.; Wallace, B. A. DichroWeb, a website for calculating protein secondary structure from circular dichroism spectroscopic data. *Protein Science* **2022**, *31* (1), 37–46.
